1 **Sexual experiences among early adolescents aged 12-14 Years in four districts of Rwanda:**  
2 **a cross-sectional study**

3 Valens Mbarushimana <sup>1,2\*</sup>, Susan Goldstein<sup>3</sup>, Daphney Nozizwe Conco<sup>1</sup>

4 1 School of Public Health, Faculty of Health Sciences, University of the Witwatersrand,  
5 Johannesburg, South Africa.

6 2 School of Public Health, College of Medicine and Health Sciences, University of Rwanda,  
7 Kigali, Rwanda.

8 3 SAMRC/Centre for Health Economics and Decision Science, PRICELESS SA, School of  
9 Public Health, Faculty of Health Sciences, University of the Witwatersrand, Johannesburg,  
10 South Africa.

11 \*Correspondence: [mbavalens@gmail.com](mailto:mbavalens@gmail.com)

12 **Abstract**

13 **Background**

14 Globally, early adolescents (10-14 years) represent 8% of the world population, and Africa  
15 accounts for 25% of them. Although a minority of early adolescents have initiated sexual  
16 intercourse, their sexual curiosity results in the exploration and understanding of sexuality.  
17 Early sexual intercourse may lead to sexually transmitted infections, HIV/AIDS, early  
18 pregnancy or fatherhood, and early marriage. Early sexual activity is associated with high rates  
19 of unplanned pregnancy, multiple sexual partners, and other forms of risky sexual behaviours.  
20 Understanding sexual activity among early adolescents can contribute to designing  
21 interventions that adequately address their needs. However, there is limited information about  
22 early adolescents' sexual activity and the social-ecological factors associated with their sexual  
23 experiences. This study aimed to determine the prevalence of sexual activity and the social-

**NOTE: This preprint reports new research that has not been certified by peer review and should not be used to guide clinical practice.**

24 ecological factors associated with sexual experiences among early adolescents (12-14 years) in  
25 Rwanda.

## 26 **Methods**

27 We conducted a cross-sectional study among early adolescents (12-14 years) from four districts  
28 and 16 secondary schools between November and December 2020. A multistage sampling  
29 technique was used to select 56 participants from each school, including 28 males and females  
30 from grades one and two, who were randomly selected. We used an adapted version of the  
31 Illustrative Questionnaire for Interview - Surveys with Young People. Questions focused on  
32 nonpenetrative and penetrative sexual experiences in addition to sociodemographic and other  
33 social-ecological characteristics. Ethical clearance was obtained from the University of Rwanda  
34 and the University of the Witwatersrand, Johannesburg. Written parental or legal guardian  
35 consent and participants' assent were obtained. We conducted the data analysis in Stata 14.2  
36 and used descriptive statistics (frequencies and proportions) and bivariate and multivariate  
37 logistic regression analyses with 95% confidence intervals (CIs) and a significance level of p-  
38 value <0.05.

## 39 **Results**

40 The study included 811 participants, 55.1% of whom were aged 14, 30.5% were aged 13, and  
41 14.4% were aged 12. Most participants (n=539, 73.5%) lived with both parents, and 48.8%  
42 (n=395) described the socioeconomic status of their households as well-off. Nearly 81%  
43 (n=658) of the participants indicated that they had experienced non-penetrative sex, and 53 of  
44 759 participants (7%) reported that they had experienced penetrative sex. The social-ecological  
45 factors significantly associated with nonpenetrative sexual experiences were attending parties  
46 (AOR=6.8, 95% CI= 1.6-29.2), internet use (AOR=1.9, 95% CI= 1.1-3.3) (individual level),  
47 and their fathers' low education (primary: AOR=2.6, 95% CI= 1.4-5.0; secondary: AOR=1.9,  
48 95%CI: 1.0-3.8) (family level). Individual level factors such as male sex (AOR: 4.6, 95% CI=

49 1.8-12.4), alcohol consumption (AOR=3.5, 95% CI= 1.4-8.8), watching pornography (3-4  
50 times: AOR=7.5, 95% CI= 1.6-34.9,  $\geq$  five times: AOR= 5.1, 95% CI= 1.7-15.0), being a  
51 double orphan (AOR:17.8, 95% CI= 1.9-170.2), discussing sex matters often with one's father  
52 (AOR=6.5, 95% CI= 1.8-23.2) (family and relationship level), and forced sexual intercourse  
53 (AOR=8.2, 95% CI= 2.7-25.4) (community level) were social-ecological factors associated  
54 with penetrative sexual experience.

## 55 **Conclusion**

56 Nonpenetrative sexual experience was common, with few participants reporting penetrative  
57 sexual experience. The social-ecological factors associated with sexual experiences among  
58 early adolescents are modifiable and can assist in planning healthy sexual interventions for this  
59 age group.

60 **Keywords:** sexual and reproductive health and rights, early adolescence, sexual experience,  
61 social-ecological framework, Rwanda

## 62 **Introduction**

63 Globally, the population of early adolescents (10-14 years) represents 8% of the world  
64 population, and the majority of these individuals live in developing countries [1]. Of the  
65 estimated 545 million early adolescents in developing countries in 2016, 143 million (26%)  
66 lived in Africa [1]. This population of early adolescents in the developing world will grow by  
67 5% by 2030, mainly in Africa, where it is predicted to grow by 34%; this population will  
68 stabilise in Asia and decrease in Latin America and the Caribbean by 2030 [1]. In Rwanda, the  
69 fourth population and Housing Census 2012 estimated early adolescents (10-14 years) to  
70 constitute 12% of the total population [2]. Sexual experiences during early adolescence are a  
71 particular focus of this study because behaviours adopted during this period tend to persist into  
72 late adolescence and adulthood; hence, there is a need for timely intervention [3].

73 Adolescence is a critical period of life during which people undergo significant biological,  
74 psychological, and social changes [4], and this period marks the transition from childhood to  
75 adulthood, during which major sexual developments occur [5, 6]. The literature categorises  
76 adolescence into early (at times called very young) adolescence (10-14 years) and late (15-19  
77 years) adolescence [7-9]. One of the salient changes in early adolescence is the body changes  
78 and sexual maturation [1]. As these changes occur in early adolescents, they acquire  
79 information, develop attitudes, adopt new behaviours, and initiate sexual relationships [10].  
80 This period provides an opportunity to address sexual violence and gender discriminatory  
81 norms before they become solid by late adolescence and adulthood [11]

82 Although a minority of early adolescents have initiated sexual intercourse, sexual curiosity  
83 increases during adolescence and leads to the exploration and understanding of sexuality [5, 10,  
84 12]. Sexual exposure becomes important during this period and may result in sexually  
85 transmitted infections, HIV/AIDS, adolescent pregnancy, adolescent fatherhood, and early  
86 marriage [5, 10], all of which can have further consequences [13]. In particular, sexual activity  
87 in adolescents aged under 15 years is associated with high rates of unplanned pregnancy,  
88 multiple sexual partners, and other forms of risky sexual behaviours [14]. Therefore, parents,  
89 policymakers and stakeholders must intervene before early adolescents face these risks and  
90 understand their behaviours to undertake timely, appropriate interventions.

91 The literature indicates that the sexual and reproductive health and rights of early adolescents  
92 are influenced by their social-ecological conditions [15-18]. Deriving from Bronfenbrenner's  
93 Ecology of Human Development [19], Svanemyr et al. suggest that a social-ecological  
94 framework recognises multiple influences on sexual behaviours and health outcomes operating  
95 at intrapersonal (e.g., sex, religious affiliation, etc.), interpersonal (e.g., relationships with  
96 parents), organisational (e.g., structures such as type of school), community (e.g., access to  
97 media) and public policy (e.g., current policies and laws on adolescent sexual and reproductive

98 health) levels [16, 18]. Furthermore, this framework suggests that such influence interacts  
99 across these levels and requires focusing on specific behaviours and outcomes (e.g., sexual  
100 experience) [16]. Finally, the framework suggests that effective interventions should be  
101 conducted at multiple levels [16]. The ecological model is applied to understand the predictors  
102 of a wide range of behaviours and sexual health outcomes [16], including sexual experiences  
103 among early adolescents. In this study, we reasoned that the nonpenetrative and penetrative  
104 sexual experiences of early adolescents occur in this social-ecological environment and that the  
105 factors associated with such experience are embedded in this framework.

106 The literature focusing on early adolescents (10-14) is relatively sparse compared with that on  
107 older adolescents (15-19 years) [1, 20, 21]. Most often, surveys on sexual behaviours miss this  
108 age group because of their young age, and subsequently, national programmes do not reach  
109 them [22]. In addition, many studies emphasise vaginal experience, and a few of them discuss  
110 nonvaginal experience during adolescence [5]. Furthermore, the literature conceptualises sexual  
111 experience as penile-vaginal intercourse [23]. Nevertheless, sexual development is  
112 multidimensional, and credit should also be given to other romantic relationships, such as  
113 boyfriend or girlfriend, nonpenetrative sexual experiences including holding, hugging, kissing  
114 or touching, and penetrative experiences (vaginal, oral, anal) [23]. However, evidence on the  
115 nonpenetrative and penetrative sexual activities of early adolescents is still scant, especially in  
116 sub-Saharan Africa. The purpose of this study was to assess the prevalence of all sexual activity  
117 among early adolescents (12-14 years) and to determine, from the social-ecological perspective,  
118 the factors associated with their sexual experiences in four districts of Rwanda.

## 119 **Materials and methods**

### 120 **Study design**

121 We conducted a quantitative cross-sectional study between December 2019 and December  
122 2020 as part of a larger study of early adolescents' knowledge, beliefs, and behaviours regarding  
123 gender and sexuality: implications for sexual experience and health outcomes in Rwanda.

### 124 **Study setting**

125 This study was conducted in 16 secondary schools in four districts with a higher prevalence of  
126 adolescent pregnancy based on the data from the Demographic and Health Survey conducted  
127 in 2014-2015 [24]. These included two urban districts (Gasabo with 12.5% and Nyarugenge  
128 with 8.8%) and two rural districts (Rwamagana: 11.9% and Ruhango: 8.2%) [24].

### 129 **Study population and sampling**

130 The study population comprised school-going early adolescents (12-14 years) in the four  
131 selected districts. We used a multistage sampling strategy to recruit the study participants from  
132 16 secondary schools. We randomly sampled two public and two private secondary schools in  
133 each district. In each school, we selected early adolescents in senior one and senior two classes  
134 of lower secondary education levels because, according to the Rwanda curriculum framework,  
135 we expected early adolescents (12-14 years) to be in these grades [25]. We randomly sampled  
136 one class for each school grade from several other classes and chose the existing class for  
137 schools with only one grade. We used a lottery method in each class to randomly select an equal  
138 number of boys and girls per grade. Therefore, 14 boys and 14 girls were selected to obtain 28  
139 early adolescents for each grade (senior one or senior two). Consequently, 56 early adolescents  
140 were sampled from each school. We collected data from 896 learners from 16 schools but  
141 excluded data from 85 learners because they were older than 14 years. The final sample size  
142 was 811 early adolescents. All participants provided informed consent from their parents or  
143 legal guardians and signed informed assent forms.

## 144 **Data collection procedures**

145 We contacted Heads of schools to whom we presented the study approvals and authorisation  
146 documentation. This documentation included ethical approvals and other administrative  
147 authorisations from the relevant institutions controlling research in Rwanda. We then discussed  
148 and set together the data collection plans with Heads of schools and affiliated school staff,  
149 including the school counsellors. A research team comprising the principal investigator and  
150 eight trained research assistants collected the data. On agreed dates, the Heads of schools and  
151 other staff members assisted the research team in connecting with the study participants and  
152 facilitated the data collection process. Participants received information about the study's  
153 objective and topics addressed in the questionnaire. Participants were advised that their  
154 participation was voluntary and that they had the right to stop answering survey questions  
155 whenever they wished. The data were collected in classrooms where participants gathered at  
156 adequate distances to keep their answers confidential. The survey questions were read aloud  
157 one by one by research assistants, and the participants were given adequate time to record their  
158 answers on the questionnaire. Each participant received a hard copy of the survey questionnaire  
159 and individual assistance from the research team members to answer the questions. Research  
160 team members monitored the entire process of data collection until completion.

## 161 **Data collection tool**

162 We adapted and used the World Health Organisation (WHO)'s illustrative questionnaire for  
163 interview – survey with young people [26]. This questionnaire was designed to investigate the  
164 sexual and reproductive health of young people, including early adolescents [26], and was  
165 approved by the WHO [27]. This questionnaire has been used in low- and middle-income  
166 countries where high validity has been reported [28], and it has been previously used in studies  
167 of older [29-32] and early adolescents [28, 33, 34]. The questionnaire content was supplemented  
168 by literature on sexual experiences [1, 13, 23, 35-43]. Professionals translated the questionnaire

169 into the local language (Kinyarwanda) and back-translated it into English to ensure consistency.  
170 The adapted version was pretested on 20 early adolescents from two schools who were not part  
171 of the sample to ascertain the clarity and conciseness of the questions.

## 172 **Measures**

### 173 **Outcome variables**

174 In this study, sexual experience comprises nonpenetrative and penetrative/coital sexual  
175 experiences. We asked participants if they had ever had a partner using a dichotomous question  
176 (yes/no): do you have or have you ever had a girlfriend, boyfriend or partner (someone whom  
177 you 'dated' (dating: going out together unaccompanied by other adults)? The participants who  
178 responded (yes) responded to a series of dichotomous questions (yes/no) as indicated in Table  
179 1 to reflect on their involvement in the nonpenetrative activity.

180 Lifetime nonpenetrative sexual experience was a composite measure obtained from eight  
181 questions on various sexual activities, including hugging, holding hands, caressing, kissing,  
182 touching, or stroking genitals, as depicted in Table 1. A positive response (yes) to these  
183 activities was considered to indicate the presence of nonpenetrative sexual experience.

184 Lifetime penetrative sexual experience was also a composite measure generated from three  
185 questions on experience of oral sex and anal and/or vaginal intercourse. A positive response  
186 (yes) to any of these questions was considered as an indication of lifetime penetrative sexual  
187 experience. Because we expected few cases of penetrative sexual experience among early  
188 adolescents, we preferred lifetime experience to a past year's experience for low-frequency  
189 sexual behaviours [23, 35].

190 **Table 1: Measures of participants' lifetime sexual experience**

| Type of experience | Questions asked | Level of measurement |
|--------------------|-----------------|----------------------|
|--------------------|-----------------|----------------------|



|                                         |                                                                                                                                                                                                                                                                                                                                                                                                                                                                                                                                                                                                                                                                                                                                                   |               |
|-----------------------------------------|---------------------------------------------------------------------------------------------------------------------------------------------------------------------------------------------------------------------------------------------------------------------------------------------------------------------------------------------------------------------------------------------------------------------------------------------------------------------------------------------------------------------------------------------------------------------------------------------------------------------------------------------------------------------------------------------------------------------------------------------------|---------------|
| <p>Nonpenetrative sexual experience</p> | <p>Did you and your boy/girlfriend/partner have any physical contact, such as hugging?</p> <p>Did you and your boy/girlfriend/partner have physical contact, such as holding hands?</p> <p>Did you and your boy/girlfriend/partner have any physical contact, such as caressing each other's bodies?</p> <p>Did you ever kiss your boy/girlfriend/partner on the lips?</p> <p>Did you ever touch your boy/girlfriend/partner's vagina/penis with your hand?</p> <p>Did you ever stroke your boy/girlfriend/partner's vagina/penis so that she/he climaxed?</p> <p>Did your boy/girlfriend/partner ever touch your penis/vagina with her /his hand?</p> <p>Did your boy/girlfriend/partner ever stroke your penis/vagina so that you climaxed?</p> | <p>Yes/no</p> |
| <p>Penetrative sexual experience</p>    | <p>Have you ever had oral sex? (oral sex is when a partner puts his/her mouth on your sex organs or you put your mouth on his/her sex organs)</p> <p>Have you ever had anal intercourse? (when a man inserts his penis into his partner's anus)</p> <p>Have you ever had vaginal intercourse with anyone? (Vaginal intercourse is when a boy/man inserts his penis into a girl's/woman's vagina)</p>                                                                                                                                                                                                                                                                                                                                              | <p>Yes/no</p> |

191 **Social-ecological covariates**

192 We collected social-ecological covariates at the individual, family relationships, and  
 193 community levels. At the individual level, we included sex (female/male), age in years (12-14),  
 194 school grade (senior one or two), and religious affiliation (catholic/protestant/others). We also  
 195 included information such as ever using a mobile phone (yes/no), ever attending parties where  
 196 young people danced (yes/no), ever drinking alcohol (yes/no), ever smoking cigarettes (yes/no),  
 197 ever using of cannabis (yes/no), ever using the internet (yes/no), ever searching for pregnancy

198 or puberty information on the internet (yes/no), and ever watching pornography (never, 1-2  
199 times, 3-4 times,  $\geq 5$  times). Covariates included at the family and relationships level were  
200 parents' life status ( none, one, both); living with these parents (none, one, both); household  
201 economic status as measured in the Ubudehe category (categories one to two and categories  
202 three to four) [44], father's and mother's level of education (primary or lower, technical and  
203 vocational education training-TVET, secondary, higher); ever discussed sex matters with the  
204 father, mother, brothers or sisters (often, occasionally, never); and perceived ease in  
205 communicating with the father, mother, and brothers or sisters (very easy, average, very  
206 difficult, do not see him/her/them). Social-ecological covariates at the community level  
207 included access to SRHR information (yes/no), type of school (public/private), ever being  
208 forced to have sexual intercourse (yes/no), and ever being touched on private parts (e.g., breast)  
209 unwillingly.

## 210 **Data analysis**

211 We conducted the data analysis in Stata 14.2 for Windows. We constructed frequency tables  
212 for all the sociodemographic characteristics of the participants. We conducted bivariate and  
213 logistic regression analyses to assess the factors associated with nonpenetrative and penetrative  
214 experiences. All variables with statistically significant results ( $p < 0.05$ ) at the bivariate analysis  
215 level were included in the logistic regression analysis, where we assessed the effect of each  
216 social-ecological covariate on participants' sexual experience. We report crude and adjusted  
217 odds ratios (ORs) with their 95% confidence intervals (CIs). The results with  $p < 0.05$  were  
218 considered as significant.

## 219 **Ethical considerations**

220 This study received ethical approval from the Institutional Review Board (IRB) of the College  
221 of Medicine and Health Sciences at the University of Rwanda (UR-CMHS) (No. 543/CMHS  
222 IRB/2019) and the Human Research Ethics Committee (HREC)-Medical of the University of

223 the Witwatersrand (clearance certificate no. M190303). In addition, the National Council for  
 224 Science and Technology (NCST) in Rwanda issued a research permit no. NCST/482/136/2019  
 225 for the current study. Before the data collection, we obtained written informed consent from the  
 226 participant's parents or legal guardians and participants' written informed assent. We collected  
 227 the data anonymously using personal identification codes on the questionnaires. There was  
 228 adequate distance between participants for their privacy and data confidentiality reasons. We  
 229 conducted this study following all national regulations and with the principles governing  
 230 research involving human subjects and school counsellors were on standby to assist in cases of  
 231 child distress.

## 232 Results

### 233 Participants' characteristics

#### 234 Individual characteristics

235 Of the 811 participants included in the analysis, 413 (50.9%) were girls, and the majority 447  
 236 (55.1%) were 14 years old. The overall mean age was 13.4±0.7 years. Most participants, 423  
 237 (52.2%), were in senior one. Of the 803 participants who indicated their religious affiliation,  
 238 290 (36.1%) participants were affiliated with the Roman Catholic Church, and the majority,  
 239 370 (46.1%), were affiliated with the Protestant Church (ADEPR and Adventist). More boys  
 240 (36.4%) than girls (31.2%), n=788, reported that they had ever used mobile phones.

241 **Table 2: Distribution of sociodemographic and behavioural characteristics of participants by sex**

|                                                  |            | Male |       | Female |       | All |       |
|--------------------------------------------------|------------|------|-------|--------|-------|-----|-------|
| Characteristics                                  | Categories | n    | %     | n      | %     | n   | %     |
| <b>Individual characteristics and behaviours</b> |            |      |       |        |       |     |       |
| Age in years (n=811)                             | 12         | 57   | 14.32 | 60     | 14.53 | 117 | 14.43 |
|                                                  | 13         | 105  | 26.38 | 142    | 34.38 | 247 | 30.46 |
|                                                  | 14         | 236  | 59.30 | 211    | 51.09 | 447 | 55.12 |

|                                                           |               | Male     |       | Female   |       | All      |       |
|-----------------------------------------------------------|---------------|----------|-------|----------|-------|----------|-------|
| Characteristics                                           | Categories    | n        | %     | n        | %     | n        | %     |
|                                                           | Mean          | 13.5±0.7 |       | 13.4±0.7 |       | 13.4±0.7 |       |
| School grade (n=811)                                      | Senior 1      | 212      | 53.27 | 211      | 51.09 | 423      | 52.16 |
|                                                           | Senior 2      | 186      | 46.73 | 202      | 48.91 | 388      | 47.84 |
| Religion (n=803)                                          | Catholic      | 140      | 35.44 | 150      | 36.76 | 290      | 36.11 |
|                                                           | Protestant    | 185      | 46.84 | 185      | 45.34 | 370      | 46.08 |
|                                                           | Others        | 70       | 17.72 | 73       | 17.89 | 143      | 17.81 |
| <b>Behaviours</b>                                         |               |          |       |          |       |          |       |
| Ever used a mobile phone (n=788) ***                      | Yes           | 287      | 74.35 | 246      | 61.19 | 533      | 67.64 |
|                                                           | No            | 99       | 25.65 | 156      | 38.81 | 255      | 32.36 |
| Ever attended parties where young people dance (n=782)    | Yes           | 48       | 12.24 | 38       | 9.50  | 86       | 10.86 |
|                                                           | No            | 344      | 87.76 | 362      | 90.50 | 706      | 89.14 |
| Ever drink alcohol (n=776) *                              | Yes           | 59       | 15.28 | 38       | 9.74  | 97       | 12.50 |
|                                                           | No            | 327      | 84.72 | 352      | 90.26 | 679      | 87.50 |
| Ever smoked cigarette (n=788)                             | Yes           | 12       | 3.13  | 6        | 1.49  | 18       | 2.28  |
|                                                           | No            | 372      | 96.88 | 398      | 98.51 | 770      | 97.72 |
| Ever use of cannabis (n=775) **                           | Yes           | 16       | 4.21  | 3        | 0.76  | 19       | 2.45  |
|                                                           | No            | 364      | 95.79 | 392      | 99.24 | 756      | 97.55 |
| Ever used internet (n=762) ***                            | Yes           | 216      | 57.60 | 174      | 44.96 | 390      | 51.18 |
|                                                           | No            | 159      | 42.40 | 213      | 55.04 | 372      | 48.82 |
| Ever searched SRH information from the internet (n=620)   | Yes           | 116      | 36.48 | 109      | 36.09 | 225      | 36.29 |
|                                                           | No            | 202      | 63.52 | 193      | 63.91 | 395      | 63.71 |
| Frequency of ever watching pornographic films (n=783) *** | Never         | 228      | 59.69 | 316      | 78.80 | 544      | 69.48 |
|                                                           | 1-2 times     | 101      | 26.44 | 58       | 14.46 | 159      | 20.31 |
|                                                           | 3-4 times     | 16       | 4.19  | 6        | 1.50  | 22       | 2.81  |
|                                                           | ≥ 5 times     | 37       | 9.69  | 21       | 5.24  | 58       | 7.41  |
| <b>Family &amp; relationships</b>                         |               |          |       |          |       |          |       |
| Parents are alive (n=802)                                 | None is alive | 7        | 1.79  | 2        | 0.49  | 9        | 1.12  |

| Characteristics                                                  | Categories             | Male |       | Female |       | All |       |
|------------------------------------------------------------------|------------------------|------|-------|--------|-------|-----|-------|
|                                                                  |                        | n    | %     | n      | %     | n   | %     |
|                                                                  | One parent is alive    | 37   | 9.44  | 36     | 8.78  | 73  | 9.10  |
|                                                                  | Both parents are alive | 348  | 88.78 | 372    | 90.73 | 720 | 89.78 |
| Living with parents (n=733)*                                     | None parent            | 9    | 2.55  | 23     | 6.05  | 32  | 4.37  |
|                                                                  | One parent             | 74   | 20.96 | 88     | 23.16 | 162 | 22.10 |
|                                                                  | Both parents           | 270  | 76.49 | 269    | 70.79 | 539 | 73.53 |
| Household economic status Categories (n=811) <sup>+</sup>        | Category 1/2           | 129  | 32.41 | 157    | 38.01 | 286 | 35.27 |
|                                                                  | Category 3/4           | 196  | 49.25 | 199    | 48.18 | 395 | 48.71 |
|                                                                  | Do not know            | 73   | 18.34 | 57     | 13.80 | 130 | 16.03 |
| Father's level of education (n=625)                              | Primary & lower        | 123  | 41.00 | 116    | 35.69 | 239 | 38.24 |
|                                                                  | TVET                   | 38   | 12.67 | 37     | 11.38 | 75  | 12.00 |
|                                                                  | Secondary              | 79   | 26.33 | 102    | 31.38 | 181 | 28.96 |
|                                                                  | Higher                 | 60   | 20.00 | 70     | 21.54 | 130 | 20.80 |
| Mother's level of education (n=693)                              | Primary or lower       | 140  | 41.67 | 165    | 46.22 | 305 | 44.01 |
|                                                                  | TVET                   | 31   | 9.23  | 35     | 9.80  | 66  | 9.52  |
|                                                                  | Secondary              | 94   | 27.98 | 96     | 26.89 | 190 | 27.42 |
|                                                                  | Higher                 | 71   | 21.13 | 61     | 17.09 | 132 | 19.05 |
| Ever discussed sex matters with the father (n=790)               | Often                  | 29   | 7.53  | 24     | 5.93  | 53  | 6.71  |
|                                                                  | Occasionally           | 116  | 30.13 | 102    | 25.19 | 218 | 27.59 |
|                                                                  | Never                  | 240  | 62.34 | 279    | 68.89 | 519 | 65.70 |
| Ever discussed sex matters with the mother (n=790)***            | Often                  | 69   | 17.97 | 175    | 43.10 | 244 | 30.89 |
|                                                                  | Occasionally           | 130  | 33.85 | 155    | 38.18 | 285 | 36.08 |
|                                                                  | Never                  | 185  | 48.18 | 76     | 18.72 | 261 | 33.04 |
| Ever discussed sex matters with the brothers or sisters (n=788)* | Often                  | 37   | 9.61  | 52     | 12.90 | 89  | 11.29 |
|                                                                  | Occasionally           | 94   | 24.42 | 121    | 30.02 | 215 | 27.28 |
|                                                                  | Never                  | 254  | 65.97 | 230    | 57.07 | 484 | 61.42 |
| Perceived ease in communicating with the father                  | (Very) easy            | 198  | 59.28 | 198    | 54.70 | 396 | 56.90 |
|                                                                  | Average                | 59   | 17.66 | 69     | 19.06 | 128 | 18.39 |

|                                                                                     |                  | Male |       | Female |       | All |       |
|-------------------------------------------------------------------------------------|------------------|------|-------|--------|-------|-----|-------|
| Characteristics                                                                     | Categories       | n    | %     | n      | %     | n   | %     |
| (n=696)                                                                             | (very) difficult | 48   | 14.37 | 60     | 16.57 | 108 | 15.52 |
|                                                                                     | Do not see him   | 29   | 8.68  | 35     | 9.67  | 64  | 9.20  |
| Perceived ease in communicating with the mother (n=773)                             | (Very) easy      | 313  | 83.47 | 324    | 81.41 | 637 | 82.41 |
|                                                                                     | Average          | 34   | 9.07  | 38     | 9.55  | 72  | 9.31  |
|                                                                                     | (very) difficult | 22   | 5.87  | 26     | 6.53  | 48  | 6.21  |
|                                                                                     | Do not see her   | 6    | 1.60  | 10     | 2.51  | 16  | 2.07  |
| Perceived ease in communicating with brothers or sisters (n=789)                    | (Very) easy      | 317  | 81.49 | 319    | 79.75 | 636 | 80.61 |
|                                                                                     | Average          | 36   | 9.25  | 35     | 8.75  | 71  | 9.00  |
|                                                                                     | (very) difficult | 26   | 6.68  | 36     | 9.00  | 62  | 7.86  |
|                                                                                     | Do not see them  | 10   | 2.57  | 10     | 2.50  | 20  | 2.53  |
| <b>Community</b>                                                                    |                  |      |       |        |       |     |       |
| Ever accessed puberty/pregnancy information (n=811)**                               | Yes              | 357  | 89.70 | 393    | 95.16 | 750 | 92.48 |
|                                                                                     | No               | 41   | 10.30 | 20     | 4.84  | 61  | 7.52  |
| Type of school (n=811)                                                              | Public           | 207  | 52.01 | 217    | 52.54 | 424 | 52.28 |
|                                                                                     | Private          | 191  | 47.99 | 196    | 47.46 | 387 | 47.72 |
| Ever been forced to have sexual intercourse (n=750)                                 | No               | 337  | 92.08 | 353    | 91.93 | 690 | 92.00 |
|                                                                                     | Yes              | 29   | 7.92  | 31     | 8.07  | 60  | 8.0   |
| Ever been touched on private parts (breast, etc.) without their willingness (n=739) | No               | 323  | 91.76 | 354    | 91.47 | 677 | 91.61 |
|                                                                                     | Yes              | 29   | 8.24  | 33     | 8.53  | 62  | 8.39  |

242 **Note:**

243 + **Economic status categories of households:** According to Ezeanya-Esiobu (44), the Government of Rwanda  
 244 categorises households into four groups according to their socioeconomic status (the Ubudehe categories): the very  
 245 poor and vulnerable individuals who are unable to feed themselves (category 1), those who can access low-class  
 246 accommodations, those who have no paid employment, and those who eat twice or less a day (category 2). Those  
 247 who earn money from their employment belong to Category 3, and those who have permanent employment and  
 248 are well-off belong to Category 4.

249 **TVET:** Technical and vocational education and training

250 \*  $p \leq 0.05$ , \*\*  $p \leq 0.01$ , \*\*\*  $p \leq 0.001$

251 Almost 11% (n=86) of the 782 participants had ever attended parties where young people  
252 danced, including 48 boys (6.1%) and 38 girls (4.8%). Nearly 13% (n=97) of the 776  
253 participants reported ever drinking alcohol, with a significantly greater proportion of boys  
254 (7.6%) than girls (4.9%). Furthermore, only 18 of the 788 participants (2.3%) reported ever  
255 smoking a cigarette, and 19 participants (2.5%), including 16 boys (4%), indicated having ever  
256 used cannabis. In total, 390 of the 762 participants (51.2%) had ever used the internet, with a  
257 significantly greater proportion of boys (28.4%) than girls (22.8%). However, 225 of the 620  
258 participants (36.3%) searched SRH information online. Concerning watching pornography, 544  
259 of the 783 participants (69.5%) noted that they had never watched pornographic films showing  
260 sexual activity. However, 159 of these participants (20.3%) watched these films 1-2 times, 58  
261 of them (7.4%) have watched these films five times or more, and higher proportions of boys  
262 than girls watched such films.

### 263 **Family and relationships**

264 Of the 802 participants who provided the life status of their parents, 720 (89.8%) indicated that  
265 both of their parents were alive. Nearly 74% (n=539) of the 733 participants stayed with both  
266 parents, while 32 (4.4%) stayed with their parents. The findings indicated that households of  
267 395 participants (48.7%) belonged to the third or fourth category of socioeconomic status, and  
268 35% (n=286) of households belonged to the first or second category (low income). In contrast,  
269 49% of the participants were from high-income households (n=395). However, 130 participants  
270 (16%) needed to know the socioeconomic status of their households (Table 2). Primary and  
271 lower were the most common education levels for the participants' fathers (38.2%) and mothers  
272 (44%) of the 625 and 693 participants (respectively), followed by secondary education (28.9%)  
273 and (27.4%), respectively.

274 Concerning the perceived ease of communicating with their fathers, 396 (56.9%) indicated that  
275 this communication was easy or very easy, while 15.5% reported that it was difficult or very  
276 difficult. Although most participants indicated that they could communicate easily with their  
277 mothers (82%, n=637), 48 of them (6%) noted that this communication was difficult or very  
278 difficult. On the other hand, 637 participants (82%) expressed ease of communication with  
279 mothers, and 636 (81%) reported that it was easy or very easy to communicate with brothers or  
280 sisters.

281 Regarding discussing sex matters with family members, 519 (65.7%) of the 790 participants  
282 had never discussed sex matters with their fathers, while 33% had never had such a discussion  
283 with their mothers. Similarly, 484 (61%) never discussed sex issues with brothers or sisters  
284 (Table 2).

## 285 **Community level**

286 Seven hundred and fifty participants (92.2%) had access to SRHR information (including  
287 information on puberty and/or pregnancy), with a significantly greater percentage of girls  
288 (48.5%) than boys (44.0%) (Table 2). Most participants were from public schools (n=424,  
289 52.3%). Sixty participants (8%) reported ever being forced to have sexual intercourse, while 62  
290 (8.4%) participants indicated ever being touched on private parts against their will.

## 291 **Early adolescents' sexual experience**

### 292 **Nonpenetrative sexual experiences**

293 In terms of nonpenetrative sexual experience, participants reported having held hands (73.6%,  
294 n=787), hugged (58.6%, n=783), kissed their lips (13.3%, n=769), or caressed each other's body  
295 (12.1%, n=780). Twenty-three of the 757 participants (3%) indicated that they had ever stroked  
296 their partner's genitals to climax, and 20 of the 779 participants (2.6%) indicated that their  
297 partners had done this to them. Touching the partner's genitals was reported by 34 of 773 (4.4%)



298 participants, while 36 of 764 participants (4.7%) indicated that their partners had ever touched  
 299 theirs. Overall, the findings show that 532 of the 658 participants (80.9%) reported some form  
 300 of nonpenetrative sexual experience (Table 3). In bivariate analysis, the factors associated with  
 301 nonpenetrative sexual experience without adjustment for other factors included ever using  
 302 mobile phones (COR= 1.6, 95% CI= 1.1-2.4); ever attending parties (COR= 9.9, 95% CI= 2.4-  
 303 41.1); ever drinking alcohol (COR= 4.1, 95% CI= 1.6-10.3); ever using the internet (COR= 1.7,  
 304 95% CI= 1.1-2.5); and their father having a primary or lower education level (COR= 1.9, 95%  
 305 CI= 1.1-3.5). Multivariate logistic regression analysis revealed that ever attending parties where  
 306 young people danced (AOR= 6.8, 95% CI= 1.6-29.2), ever using the internet (AOR= 1.9, 95%  
 307 CI= 1.1-3.3), and having a father with lower education level (primary or lower: AOR=2.6, 95%  
 308 CI= 1.3-5.0, and secondary education: AOR=1.9, 95%CI: 1.0-3.8) were factors significantly  
 309 associated with nonpenetrative sexual experience (Table 4).

310 **Table 3: Sexual experience of early adolescents by biological sex**

| Sexual experience                 |       | Gender |       |        |       |     |       | p-value |
|-----------------------------------|-------|--------|-------|--------|-------|-----|-------|---------|
|                                   |       | Male   |       | Female |       | All |       |         |
|                                   |       | n      | %     | n      | %     | n   | %     |         |
| <b>Non-penetrative experience</b> |       |        |       |        |       |     |       |         |
| Hugging                           | Yes   | 231    | 60.2  | 228    | 57.1  | 459 | 58.6  | 0.392   |
|                                   | No    | 153    | 39.8  | 171    | 42.9  | 324 | 41.4  |         |
|                                   | Total | 384    | 100.0 | 399    | 100.0 | 783 | 100.0 |         |
| Holding hands                     | Yes   | 290    | 74.9  | 289    | 72.3  | 579 | 73.6  | 0.393   |
|                                   | No    | 97     | 25.1  | 111    | 27.8  | 208 | 26.4  |         |
|                                   | Total | 387    | 100.0 | 400    | 100.0 | 787 | 100.0 |         |
| Caressing each other's bodies     | Yes   | 63     | 16.4  | 31     | 7.8   | 94  | 12.1  | <0.001  |
|                                   | No    | 321    | 83.6  | 365    | 92.2  | 686 | 87.9  |         |

|                                                                                      |       |     |       |     |       |     |       |        |
|--------------------------------------------------------------------------------------|-------|-----|-------|-----|-------|-----|-------|--------|
|                                                                                      | Total | 384 | 100.0 | 396 | 100.0 | 780 | 100.0 |        |
| Kissing a boy/girlfriend/partner on the lips                                         | Yes   | 61  | 15.9  | 41  | 10.6  | 102 | 13.3  | 0.030  |
|                                                                                      | No    | 322 | 84.1  | 345 | 89.4  | 667 | 86.7  |        |
|                                                                                      | Total | 383 | 100.0 | 386 | 100.0 | 769 | 100.0 |        |
| Touching a boy/girlfriend/partner's vagina/penis with a hand                         | Yes   | 27  | 7.1   | 7   | 1.8   | 34  | 4.4   | <0.001 |
|                                                                                      | No    | 354 | 92.9  | 385 | 98.2  | 739 | 95.6  |        |
|                                                                                      | Total | 381 | 100.0 | 392 | 100.0 | 773 | 100.0 |        |
| Stroking a boy/girlfriend/partner's vagina/penis so that she/he climaxed             | Yes   | 18  | 4.9   | 5   | 1.3   | 23  | 3.0   | 0.004  |
|                                                                                      | No    | 348 | 95.1  | 386 | 98.7  | 734 | 97.0  |        |
|                                                                                      | Total | 366 | 100.0 | 391 | 100.0 | 757 | 100.0 |        |
| His/her boy/girlfriend/partner ever touch her/his penis/vagina with her/his hand     | Yes   | 26  | 6.8   | 10  | 2.6   | 36  | 4.7   | 0.006  |
|                                                                                      | No    | 354 | 93.2  | 374 | 97.4  | 728 | 95.3  |        |
|                                                                                      | Total | 380 | 100.0 | 384 | 100.0 | 764 | 100.0 |        |
| His/her boy/girlfriend/partner ever stroke his/her penis/vagina so that you climaxed | Yes   | 16  | 4.2   | 4   | 1.0   | 20  | 2.6   | 0.006  |
|                                                                                      | No    | 369 | 95.8  | 390 | 99.0  | 759 | 97.4  |        |
|                                                                                      | Total | 385 | 100.0 | 394 | 100.0 | 779 | 100.0 |        |
| Prevalence of nonpenetrative sexual experience                                       | Yes   | 262 | 81.9  | 270 | 79.9  | 532 | 80.9  | 0.516  |
|                                                                                      | No    | 58  | 18.1  | 68  | 20.1  | 126 | 19.1  |        |
|                                                                                      | Total | 320 | 100.0 | 338 | 100.0 | 658 | 100.0 |        |
| <b>Penetrative experience</b>                                                        |       |     |       |     |       |     |       |        |
| Ever had oral sex                                                                    | Yes   | 18  | 4.6   | 3   | 0.7   | 21  | 2.6   | 0.001  |
|                                                                                      | No    | 373 | 95.4  | 402 | 99.3  | 775 | 97.4  |        |
|                                                                                      | Total | 391 | 100.0 | 405 | 100.0 | 796 | 100.0 |        |
| Ever had anal intercourse                                                            | Yes   | 21  | 5.4   | 1   | 0.2   | 22  | 2.8   | <0.001 |
|                                                                                      | No    | 369 | 94.6  | 402 | 99.8  | 771 | 97.2  |        |
|                                                                                      | Total | 390 | 100.0 | 403 | 100.0 | 793 | 100.0 |        |
| Ever had vaginal intercourse with                                                    | Yes   | 26  | 6.9   | 10  | 2.5   | 36  | 4.7   | 0.004  |

|                                             |       |     |       |     |       |     |       |        |
|---------------------------------------------|-------|-----|-------|-----|-------|-----|-------|--------|
| anyone                                      | No    | 353 | 93.1  | 384 | 97.5  | 737 | 95.3  |        |
|                                             | Total | 379 | 100.0 | 394 | 100.0 | 773 | 100.0 |        |
| Prevalence of penetrative sexual experience | Yes   | 41  | 11.1  | 12  | 3.1   | 53  | 7.0   | <0.001 |
|                                             | No    | 330 | 88.9  | 376 | 96.9  | 706 | 93.0  |        |
|                                             | Total | 371 | 100.0 | 388 | 100.0 | 759 | 100.0 |        |

311

---

312 **Penetrative experience**

313 The results highlighted that some participants had experienced some form of penetrative sex,  
314 including vaginal, anal, or oral sex. The findings indicated that 36 of 773 participants (4.6%)  
315 have had vaginal intercourse, 22 of the 793 (2.7%) have had anal intercourse, and 21 of the 796  
316 participants (2.6%) reported ever having had oral sex. Overall, 53 of 759 (7.0%) reported any  
317 of these activities involving penetrative sexual experience (oral, vaginal, anal penetration)  
318 (Table 3). The bivariate analysis of penetrative sexual experience indicated that the factors  
319 associated with penetrative sexual experience included male sex (COR= 3.9, 95% CI= 2.0-7.5),  
320 ever attending parties where young people danced (COR= 3.2, 95% CI= 1.6-6.4), ever drinking  
321 alcohol (COR= 7.1, 95% CI= 3.8-13.2), ever smoking cigarettes (COR= 16.7, 95% CI= 6.3-  
322 44.3), ever using cannabis (COR=57.9, 95% CI= 18.0-186.3), and ever watching pornographic  
323 films (COR= 3.5, 95% CI= 1.9-6.4). In addition, participants whose both parents were not alive  
324 (COR= 19.2, 95% CI= 4.9-74.4), who perceived that communication with their mothers was  
325 difficult (COR= 3.4, 95% CI= 1.4-8.3), and whose communication with brothers or sisters was  
326 perceived as difficult (COR= 2.6, 95% CI= 1.2-6.1) had higher odds of penetrative sexual  
327 experience. Additional factors associated with penetrative sexual experience in the bivariate  
328 analysis included ever being forced to have sexual intercourse (COR= 9.8, 95% CI= 5.1-19.0)  
329 and ever being touched on private parts (COR= 4.8, 95% CI= 2.4-9.5). Discussing sex matters  
330 often with fathers was associated with higher odds of penetrative sexual experience (COR= 3.5,  
331 95% CI=1.5-8.2). The multivariate logistic regression analysis indicated that male participants

332 (AOR= 4.6, 95% CI= 1-8-12.4) ever drinking alcohol (AOR= 3.5, 95% CI= 1.4-8.8), ever  
 333 watching pornography (3-5 times, AOR= 7.5, 95% CI= 1.6-34.9;  $\geq$  five times, (AOR= 5.1, 95%  
 334 CI= 1.7-15.0); being full orphan (AOR= 17.8, 95% CI= 1.9-170.2), and ever being forced to  
 335 have sexual intercourse (AOR= 8.2, 95% CI= 2.7-25.4). In addition, often discussing sex  
 336 matters with one's father (AOR= 6.5, 95% CI= 1.8-23.2) was associated with higher odds of  
 337 penetrative sexual experience (Table 4).

338 **Table 4: Results from the bivariate and multivariate logistic regression analyses between participants'**  
 339 **sexual experience and social-ecological covariates**

|                                                  |            | Non-penetrative sexual experience |                       | Penetrative sexual experience |                      |
|--------------------------------------------------|------------|-----------------------------------|-----------------------|-------------------------------|----------------------|
| Variable                                         | Categories | COR (95%CI), p-value              | AOR (95%CI), p-value  | COR (95%CI), p-value          | AOR (95%CI), p-value |
| <b>Individual characteristics and behaviours</b> |            |                                   |                       |                               |                      |
| Sex                                              | Female     | 1                                 |                       | 1                             | 1                    |
|                                                  | Male       | 1.1(0.7-1.7), 0.516               |                       | 3.9 (2.0-7.5), <0.001         | 4.6(1.8-12.4), 0.002 |
| Age in years                                     | 12         | 1                                 |                       | 1                             |                      |
|                                                  | 13         | 0.8(0.5-1.6), 0.701               |                       | 0.5 (0.2- 1.3), 0.164         |                      |
|                                                  | 14         | 1.1(0.6-1.9), 0.864               |                       | 0.8 (0.4- 1.9), 0.779         |                      |
| School grade                                     | Senior 1   | 1                                 |                       | 1                             |                      |
|                                                  | Senior 2   | 0.7(0.5-1.1)                      |                       | 0.6 (0.3- 1.2), 0.210         |                      |
| Religion                                         | Catholic   | 1                                 |                       | 1                             |                      |
|                                                  | Protestant | 1.0(0.7-1.6), 0.939               |                       | 0.5 (.2- 1.0), 0.053          |                      |
|                                                  | Others     | 0.8(0.4-1.4), 0.369               |                       | 0.7 (0.3-1.6), 0.499          |                      |
| <b>Behaviours</b>                                |            |                                   |                       |                               |                      |
| Have you ever used a mobile phone?               | Yes        | 1                                 | 1                     | 1                             |                      |
|                                                  | No         | 0.6(0.4-0.9), 0.023               | 1.0 (0.6-1.8), 0.999  | 1.0 (0.5-1.8), 0.970          |                      |
| Ever attend parties where young people dance     | No         | 1                                 | 1                     | 1                             | 1                    |
|                                                  | Yes        | 9.9(2.4-41.1), 0.002              | 6.8 (1.6-29.2), 0.010 | 3.2 (1.6-6.4), 0.001          | 0.9(0.3-3.0), 0.982  |
| Ever drink alcohol                               | No         | 1                                 | 1                     | 1                             | 1                    |

|                                               |                        | Non-penetrative sexual experience |                      | Penetrative sexual experience |                       |
|-----------------------------------------------|------------------------|-----------------------------------|----------------------|-------------------------------|-----------------------|
| Variable                                      | Categories             | COR (95%CI), p-value              | AOR (95%CI), p-value | COR (95%CI), p-value          | AOR (95%CI), p-value  |
|                                               | Yes                    | 4.1(1.6-10.3), 0.003              | 1.9 (0.6-5.8), 0.217 | 7.1 (3.8-13.2), <0.001        | 3.5(1.4-8.8), 0.008   |
| Ever smoked cigarette                         | No                     | 1                                 |                      | 1                             | 1                     |
|                                               | Yes                    | omitted                           |                      | 16.7 (6.3-44.3), <0.001       | 2.4(0.3-19.5), 0.415  |
| Ever use of cannabis.                         | No                     | 1                                 |                      | 1                             | 1                     |
|                                               | Yes                    | 3.2(0.4-25.2), 0.253              |                      | 57.9(18.0-186.3), <0.001      | 5.1(0.7-38.8), 0.111  |
| Ever used internet                            | No                     | 1                                 | 1                    | 1                             |                       |
|                                               | Yes                    | 1.7(1.1-2.5), 0.010               | 1.9 (1.1-3.3), 0.023 | 1.1 (0.6-1.9), 0.722          |                       |
| Ever searched SRH information on the internet | No                     | 1                                 |                      | 1                             |                       |
|                                               | Yes                    | 1.4(0.8-2.2), 0.154               |                      | 0.7 (0.3-1.4), 0.292          |                       |
| Frequency of ever watching pornographic films | Never                  | 1                                 |                      | 1                             | 1                     |
|                                               | 1-2 times              | 1.6(0.9-2.8), 0.062               |                      | 2.4 (1.2-4.9), 0.012          | 1.9(0.7-5.4), 0.193   |
|                                               | 3-4 times              | 1                                 |                      | 10.1 (3.5-29.0), <0.001       | 7.5(1.6-34.9), 0.010  |
|                                               | ≥ 5 times              | 1                                 |                      | 4.7 (2.0-10.9), <0.001        | 5.1(1.7-15.0), 0.003  |
| <b>Family &amp; relationships</b>             |                        |                                   |                      |                               |                       |
| Parents are alive                             | None is alive          | 1                                 |                      | 19.2 (4.9-74.4), <0.001       | 17.8(1.9-170.2),0.013 |
|                                               | One parent is alive    | 0.8(0.4-1.6), 0.667               |                      | 1.7 (0.7-4.11), 0.185         | 2.6(0.8-8.5),0.118    |
|                                               | Both parents are alive | 1                                 |                      | 1                             |                       |
| Living with parents                           | None parent            | 0.5(0.2-1.2), 0.115               |                      | 2.6 (0.8-8.0), 0.090          |                       |
|                                               | One parent             | 1.1(0.6-1.7), 0.835               |                      | 1.2 (0.6-2.6), 0.497          |                       |
|                                               | Both parents           | 1                                 |                      | 1                             |                       |
| Household Economic status                     | Poor (Category 1/2)    | 1                                 |                      | 1                             |                       |

|                                                     |                            | Non-penetrative sexual experience |                      | Penetrative sexual experience |                      |
|-----------------------------------------------------|----------------------------|-----------------------------------|----------------------|-------------------------------|----------------------|
| Variable                                            | Categories                 | COR (95%CI), p-value              | AOR (95%CI), p-value | COR (95%CI), p-value          | AOR (95%CI), p-value |
|                                                     | Well-off<br>(Category 3/4) | 1.4(0.8-2.1), 0.163               |                      | 0.7 (0.4-1.4), 0.370          |                      |
|                                                     | Do not know                | 1.3(0.7-2.4), 0.370               |                      | 2.3 (1.1-4.6), 0.019          |                      |
| Father's level of education                         | Primary & lower            | 1.9(1.1-3.5), 0.025               | 2.6 (1.4-5.0), 0.003 | 2.0 (0.6-6.2), 0.230          |                      |
|                                                     | TVET                       | 0.9(0.4-1.9), 0.854               | 1.4 (0.6-3.1), 0.389 | 0.8 (0.2-4.7), 0.853          |                      |
|                                                     | Secondary                  | 1.4(0.7-2.6), 0.255               | 1.9 (1.0-3.8), 0.039 | 2.6 (0.8-8.3), 0.090          |                      |
|                                                     | Higher                     | 1                                 | 1                    | 1                             |                      |
| Mother's level of education                         | Primary or lower           | 0.9(0.5-1.6), 0.727               |                      | 0.8 (0.3-1.9) 0.650           |                      |
|                                                     | TVET                       | 0.9(0.4-2.4), 0.930               |                      | 1.8 (0.6-5.1), 0.220          |                      |
|                                                     | Secondary                  | 0.8(0.4-1.6), 0.578               |                      | 0.4 (0.1-1.3), 0.136          |                      |
|                                                     | Higher                     | 1                                 |                      | 1                             |                      |
| Ever discussed sex matters with the father          | Often                      | 0.6(0.3-1.2), 0.121               |                      | 3.5(1.5-8.2), 0.004           | 6.5(1.8-23.2), 0.004 |
|                                                     | Occasionally               | 0.8(0.5-1.3), 0.385               |                      | 1.9(1.0-3.6), 0.046           | 1.7(0.7-4.3), 0.202  |
|                                                     | Never                      | 1                                 |                      | 1                             | 1                    |
| Ever discussed sex matters with the mother          | Often                      | 1                                 |                      | 1                             |                      |
|                                                     | Occasionally               | 1.2(0.7-1.8), 0.528               |                      | 0.6 (0.3-1.4), 0.221          |                      |
|                                                     | Never                      | 1.2(0.7-1.9), 0.456               |                      | 1.6 (0.8-3.2), 0.188          |                      |
| Ever discussed sex matters with brothers or sisters | Often                      | 1                                 |                      | 1                             |                      |
|                                                     | Occasionally               | 0.7(0.3-1.5), 0.417               |                      | 1.2 (0.4-3.3), 0.775          |                      |
|                                                     | Never                      | 0.6(0.3-1.3), 0.201               |                      | 0.9 (0.4-2.5), 0.931          |                      |
| Perceived ease in communicating with the father     | (Very) easy                | 1                                 |                      | 1                             |                      |
|                                                     | Average                    | 0.8(0.5-1.5), 0.640               |                      | 0.9 (0.4-2.5), 0.953          |                      |
|                                                     | (very) difficult           | 1.8(0.9-3.4), 0.088               |                      | 1.4 (0.6-3.5), 0.446          |                      |
|                                                     | Do not see him             | 1.0(0.5-2.1), 0.088               |                      | 2.1 (0.8-5.4), 0.141          |                      |
| Perceived ease in communicating with the mother     | (Very) easy                | 1                                 |                      | 1                             | 1                    |
|                                                     | Average                    | 0.8(0.5-1.6), 0.640               |                      | 1.7 (0.7-4.4), 0.236          | 1.5(0.4-5.9), 0.535  |
|                                                     | (very) difficult           | 4.0 (0.9-16.9), 0.059             |                      | 3.4 (1.4-8.3), 0.006          | 2.7(0.8-8.8), 0.101  |
|                                                     | Do not see her             | 0.7(0.2-2.6), 0.610               |                      | 1                             | 1.1(0.1-14.8), 0.955 |
| Perceived ease in communicating                     | (Very) easy                | 1                                 |                      | 1                             | 1                    |
|                                                     | Average                    | 0.5(0.3-1.0), 0.051               |                      | 1.4 (0.5-3.6), 0.529          | 1.5 (0.4-5.5), 0.535 |

|                                                              |                  | Non-penetrative sexual experience |                      | Penetrative sexual experience |                       |
|--------------------------------------------------------------|------------------|-----------------------------------|----------------------|-------------------------------|-----------------------|
| Variable                                                     | Categories       | COR (95%CI), p-value              | AOR (95%CI), p-value | COR (95%CI), p-value          | AOR (95%CI), p-value  |
| with brothers or sisters                                     | (very) difficult | 1.0(0.5-2.2), 0.942               |                      | 2.6 (1.2-6.1), 0.020          | 2.7 (0.8-8.7), 0.101  |
|                                                              | Do not see them  | 0.5(0.2-1.5), 0.242               |                      | 3.2 (0.8-11.4), 0.077         | 1.1(0.07-14.8), 0.955 |
| <b>Community level</b>                                       |                  |                                   |                      |                               |                       |
| Type of school                                               | Public           | 1                                 |                      | 1                             |                       |
|                                                              | Private          | 0.9(0.6-1.3), 0.639               |                      | 1.7 (.9- 3.0), 0.060          |                       |
| Access to pregnancy or puberty information                   | No               | 1                                 |                      | 1                             |                       |
|                                                              | Yes              | 1.2(0.6-2.5), 0.542               |                      | 2.2 (0.5-9.3), 0.284          |                       |
| Ever been forced to have sexual intercourse                  | No               | 1                                 |                      | 1                             |                       |
|                                                              | Yes              | 2.5(0.9-7.3), 0.079               |                      | 9.8 (5.1-19.0), <0.001        | 8.2(2.7-25.4), <0.001 |
| Ever been touched on private parts without their willingness | No               | 1                                 |                      | 1                             |                       |
|                                                              | Yes              | 1.8(0.7-4.4), 0.183               |                      | 4.8 (2.4-9.5), <0.001         | 0.8(0.2-2.9), 0.736   |

340 \*COR: crude odds ratio; AOR: adjusted odds ratio

## 341 Discussion

342 This study aimed to assess the sexual experiences and the social-ecological factors associated  
343 with such experiences among early adolescents from selected districts in Rwanda. The findings  
344 indicated that more than four out of five early adolescents (81%) had started engaging in at least  
345 one nonpenetrative sexual activity, including hugging, holding hands, caressing, and touching  
346 or being touched on their genitals. Concerning being touched by genitals among girls, the  
347 prevalence ranged from 1 to 2.6% in the present study, which corroborates the findings of  
348 Maina et al., who reported a prevalence of 1% among very young adolescent girls in Nairobi,  
349 Kenya [45]. However, the prevalence of caressing in this study was 7.8% among girls, which

350 Maina et al. [45] did not include. Furthermore, this study found a greater prevalence of hugging  
351 (57.1%) and holding hands (72.3%) than was found by Maina et al., which were respectively  
352 6% and 9% among very young adolescent girls in Nairobi, Kenya [45]. In addition, the  
353 prevalence of kissing was greater among girls (10.6%) in the present study, while Maina et al.  
354 reported 2% of young adolescents in Nairobi, Kenya [45]. In a different study in Kenya,  
355 Kågesten et al. indicated that most early adolescents have not engaged in romantic and sexual  
356 activities [23]. Findings from early adolescents (11-14 years) in Korogocho slums, Kenya,  
357 indicated that the proportions of hugging (8.6%), kissing (2.7%), holding hands (10.5%), and  
358 fondling (2.5%) were lower than those in this study, with boys having higher proportions than  
359 girls [23]. In general, these findings suggest that early adolescents experience some  
360 nonpenetrative sexual activities, with differences among boys and girls.

361 Concerning the factors associated with nonpenetrative sexual experience, logistic regression  
362 analysis revealed that attending parties involving other young people, using the internet, and  
363 having a primary and secondary education level of the participants' fathers were found to be  
364 independent predictors of nonpenetrative sexual experiences. The literature highlights the role  
365 of the internet in the provision of SRHR information [46-50] and in influencing the sexual  
366 behaviours of adolescents. For example, pornography and sexually explicit photographs teach  
367 young adolescents about sex and what it looks like, which may have both positive and negative  
368 consequences for the sexual behaviours of adolescents [50, 51]. Parents are the main sources of  
369 SRHR information for adolescents [15, 52]. They constitute important models in their children's  
370 lives and transmit values, traditions, and lifestyles that inform healthy decision-making about  
371 sexual health [53]. Furthermore, improved communication between parents and adolescents  
372 contributes to healthy sexual behaviours [22, 54, 55], and parents' education may be beneficial  
373 in promoting adolescent reproductive health [56]. However, discussing sex matters often with  
374 one's father was a risk factor for penetrative sexual experience in this study from penetrative



375 sexual experience. This finding contrasts with the knowledge that parent-child communication  
376 about sexual issues enhances healthy sexual behaviours among adolescents [22, 57-59].

377 Nearly 7% of all early adolescents, including 11% of boys and 3% of girls, reported penetrative  
378 sexual experiences, including oral sex and anal and/or vaginal intercourse. Studies of early  
379 adolescents (12-15 years) have shown similar estimates (6.9%) of lifetime sexual intercourse  
380 in Low and Middle-income Countries (LMICs) [60] and among American Indian and Alaskan  
381 Native Youth aged 12-14 years (6.5%) [35]. Similarly, Roman et al. reported that sexual  
382 initiation among Brazilian early adolescents (12-14 years) was lower in girls (7%) than in boys  
383 (18%) [61], which was similar to the trend observed in this study and others in LMICs and  
384 Korea [60, 62]. Nevertheless, penetrative sexual experience was slightly lower in Indonesia  
385 (5.3%, including 6.9% of boys and 3.8% of girls) than in the present study, as indicated in the  
386 2015 Global School-based Health Survey by Rizkianti et al. [63]. In addition, Maina et al.  
387 reported that the proportion of girls (10-14 years) with sexual intercourse was 2% in Nairobi,  
388 Kenya [45], compared to 3% in this study. The prevalence of sexual intercourse before age 13  
389 in the United States of America was found to be slightly greater than that in the present study  
390 (7.6%) [64]. In contrast, Magnusson reported that 17% of adolescents were younger than 15  
391 years at first sexual intercourse [65], and Hellerstedt et al. reported that 42% of American Indian  
392 Youths aged 13-15 years had ever had sexual intercourse [66]. In addition, Kushal et al. reported  
393 that early sexual initiation was 14.2% among early adolescents (12-15 years) in 50 countries  
394 where the Global School-based Health Survey was conducted between 2009 and 2015. The  
395 prevalence of penetrative sexual experiences among early adolescents is in line with the  
396 findings of other studies in LMICs. Nonetheless, this prevalence differs in the United States of  
397 America, where a higher prevalence has been reported, as well as in Indonesia and Kenya,  
398 where lower penetrative sexual experiences have been indicated.

399 Concerning the factors associated with penetrative sexual experience, this study showed that  
400 ever being forced to have sexual intercourse was strongly associated with penetrative sex. On  
401 this point, the literature indicates that early sexual experience among adolescents occurs in the  
402 context of sexual coercion and violence [1, 13, 67]. This study also revealed that a high  
403 frequency of watching pornographic films was associated with penetrative sexual experience,  
404 which is consistent with previous studies indicating that exposure to pornography may have  
405 harmful effects on sexual maturation and behaviours in adolescents [17, 68, 69] and that first  
406 sex was associated with exposure to pornography [70-72]. In addition, another study involving  
407 adolescents aged 10-19 years in rural eastern Uganda found that watching sexually explicit  
408 films was associated with ever having sexual intercourse [73]. Furthermore, pornography use  
409 by adolescents results in unprotected penetrative and oral sex, a high frequency of casual sex,  
410 and an earlier onset of sexual activity [74]. The current study also highlighted that male  
411 participants were more likely to experience penetrative sexual experiences, which is consistent  
412 with findings from Reis et al. [75], Kushal et al. [76], and Roman et al. [61]. This may be due  
413 to masculinity norms encouraging boys to early sexual initiation [75].

414 Smoking and ever-drinking alcohol in the present study were associated with penetrative sexual  
415 experiences. This finding is consistent with other research indicating that smoking cigarettes  
416 and using alcohol and other drugs were associated with sexual intercourse among in-school  
417 adolescents from five sub-Saharan African countries [77] and among older adolescents and  
418 youths [78]. Furthermore, a study of the factors associated with sexual initiation among  
419 participants, including early adolescents in Brazil, revealed that the use of alcoholic beverages  
420 was associated with early sexual initiation [61, 79]. Similarly, a higher prevalence of early  
421 sexual initiation (14.2%) was reported in another study involving early adolescents aged 12-15  
422 years in 50 countries [76].

## 423 **Study limitations and strengths**

424 This study has several limitations. One of them is the use of cross-sectional data to determine  
425 causality. Another limitation of this study is the generalizability of the findings. However, the  
426 selected number of participants was representative of the study population, and their data  
427 provided insights into the SRHR knowledge and sexual experience of early adolescents in  
428 Rwanda. In addition, the findings were obtained based on participants' self-reports about  
429 sexuality, which might have been affected by social desirability, especially when reporting  
430 (underreporting or overreporting) sexual experiences [80, 81]. We minimised this through  
431 privacy, anonymity and voluntary participation. Finally, there is the possibility of recall bias  
432 because participants had to remember and report their sexual experiences, which suggests that  
433 they might have forgotten important information related to their sexual experiences. Despite  
434 these limitations, this study contributes to the extant body of literature on early adolescents by  
435 providing an overview of the prevalence and factors associated with sexual experience in sub-  
436 Saharan Africa, specifically in Rwanda. This study enriches the body of literature and provides  
437 baseline information for SRHR interventions to improve the sexual and reproductive health and  
438 rights of early adolescents in Rwanda and elsewhere.

## 439 **Conclusion**

440 This study showed that the prevalence of nonpenetrative sexual experience among early  
441 adolescents was 81%, and 7% of the participants reported penetrative sexual experience.  
442 Penetrative sexual experience at the individual level was associated with being male sex, and  
443 behaviours such as drinking alcohol and watching films showing sexual content. Being a double  
444 orphan and often discussing sex matters with one's father were independently associated with  
445 increased odds of penetrative sexual experience (family and relationships level). Being forced  
446 to have sexual intercourse was also associated with penetrative sexual experience (community  
447 level). The study showed that behaviours such as attending parties, using the internet, and

448 reporting a low father's education level (family level) were associated with nonpenetrative  
449 sexual experiences. These findings suggest the need for public health interventions, including  
450 educating early adolescents, especially boys, about SRHR, reducing alcohol consumption,  
451 addressing child abuse, monitoring access to SRHR information sources, especially the internet,  
452 scaling up parental education levels, especially about SRHR, and discussing SRHR with family  
453 members. These findings have implications for achieving sustainable development goals  
454 (SDGs) related to early adolescent sexual and reproductive health and rights in Rwanda,  
455 regionally and globally.

#### 456 **Acknowledgements**

457 This research was supported by the Consortium for Advanced Research Training in Africa  
458 (CARTA). CARTA is jointly led by the African Population and Health Research Center and  
459 the University of the Witwatersrand and funded by the Carnegie Corporation of New York  
460 (Grant No. G-19-57145), Sida (Grant No:54100113), Uppsala Monitoring Center, Norwegian  
461 Agency for Development Cooperation (Norad), and by the Wellcome Trust [reference no.  
462 107768/Z/15/Z] and the UK Foreign, Commonwealth & Development Office, with support  
463 from the Developing Excellence in Leadership, Training, and Science in Africa (DELTAS  
464 Africa) programme. The statements made and views expressed are solely the responsibility of  
465 the Fellow.

#### 466 **References**

- 467 1. Woog V, Kågesten A. The Sexual and Reproductive Health Needs of Very Young  
468 Adolescents Aged 10–14 in Developing Countries: What Does the Evidence Show? New York:  
469 Guttmacher Institute; 2017. 56 p.
- 470 2. National Institute of Statistics of Rwanda (NISR), Ministry of Finance and Economic  
471 Planning (MINECOFIN) [Rwanda]. Rwanda Fourth Population and Housing Census. Thematic  
472 Report: Population size, structure and distribution. Kigali: NISR & MINECOFIN, 2012.

- 473 3. Lassi ZS, Salam RA, Das JK, Wazny K, Bhutta ZA. An unfinished agenda on adolescent  
474 health: Opportunities for interventions. *Seminars in Perinatology*. 2015;39(5):353-60. doi  
475 <https://doi.org/10.1053/j.semperi.2015.06.005>.
- 476 4. Rankin K, Heard A, Diaz N. Adolescent sexual and reproductive health: the state of  
477 evidence on the impact of programming in low- and middle-income countries. 3ie Scoping  
478 Paper 5,. New Delhi: International Initiative for Impact Evaluation (3ie); 2016.
- 479 5. Kar SK, Choudhury A, Singh AP. Understanding normal development of adolescent  
480 sexuality: A bumpy ride. *Journal of human reproductive sciences*. 2015;8(2):70-4. doi:  
481 10.4103/0974-1208.158594. PubMed PMID: 26157296; PubMed Central PMCID:  
482 PMC4477452.
- 483 6. Igras SM, Macieira M, Murphy E, Lundgren R. Investing in very young adolescents'  
484 sexual and reproductive health. *Global public health*. 2014;9(5):555-69. doi:  
485 10.1080/17441692.2014.908230. PubMed PMID: 24824757; PubMed Central PMCID:  
486 PMC4066908.
- 487 7. Morris JL, Rushwan H. Adolescent sexual and reproductive health: The global  
488 challenges. *International Journal of Gynecology & Obstetrics*. 2015;131:S40-S2. doi  
489 <https://doi.org/10.1016/j.ijgo.2015.02.006>.
- 490 8. Blum RW, Astone NM, Decker MR, Mouli VC. A conceptual framework for early  
491 adolescence: a platform for research. *International journal of adolescent medicine and health*.  
492 2014;26(3):321-31. Epub 2014/02/04. doi: 10.1515/ijamh-2013-0327. PubMed PMID:  
493 24486726; PubMed Central PMCID: PMC4476282.
- 494 9. Magis-Weinberg L, Ballonoff Suleiman A, Dahl RE. Context, Development, and  
495 Digital Media: Implications for Very Young Adolescents in LMICs. *Front Psychol*.  
496 2021;12:632713. doi: 10.3389/fpsyg.2021.632713. PubMed PMID: 33967899; PubMed  
497 Central PMCID: PMC8097039.

- 498 10. Chimwaza-Manda W, Kamndaya M, Pilgrim N, Mathur S, Chipeta EK, Sikweyiya Y.  
499 Social support and very young adolescent girl's knowledge on sexual relationships: A  
500 comparative qualitative study of Girl Only Clubs' participants and non-participants in rural  
501 Malawi. PLOS Global Public Health. 2023;3(1):e0001339. doi:  
502 10.1371/journal.pgph.0001339.
- 503 11. Blum RW, Boyden J, Erulkar A, Kabiru C, Wilopo S. Achieving Gender Equality  
504 Requires Placing Adolescents at the Center. Journal of Adolescent Health. 2019;64(6):691-3.  
505 doi 10.1016/j.jadohealth.2019.02.002.
- 506 12. Bankole A, Biddlecom A, Guiella G, Singh S, Zulu E. Sexual Behavior, Knowledge  
507 and Information Sources of Very Young Adolescents in Four Sub-Saharan African Countries.  
508 African journal of reproductive health. 2007;11(3):28-43.
- 509 13. Gambadauro P, Carli V, Hadlaczky G, Sarchiapone M, Apter A, Balazs J, et al.  
510 Correlates of sexual initiation among European adolescents. PloS one. 2018;13(2):e0191451.  
511 Epub 2018/02/09. Doi: 10.1371/journal.pone.0191451. PubMed PMID: 29420612; PubMed  
512 Central PMCID: PMC5805230.
- 513 14. Lee J. The Impact of Sexual Initiation Timing and Sexual Experience on Depressive  
514 Symptoms in South Korean Adolescents: Gender Differences in a Nationwide Cross-Sectional  
515 Study. Journal of pediatric nursing. 2020;52:e15-e20. doi: 10.1016/j.pedn.2019.11.009.  
516 PubMed PMID: 31785967.
- 517 15. Kyilleh JM, Tabong PT, Konlaan BB. Adolescents' reproductive health knowledge,  
518 choices and factors affecting reproductive health choices: a qualitative study in the West Gonja  
519 District in Northern region, Ghana. BMC Int Health Hum Rights. 2018;18(1):6. doi:  
520 10.1186/s12914-018-0147-5. PubMed PMID: 29361947; PubMed Central PMCID:  
521 PMC5782392.

- 522 16. Svanemyr J, Amin A, Robles OJ, Greene ME. Creating an enabling environment for  
523 adolescent sexual and reproductive health: a framework and promising approaches. *The Journal*  
524 *of adolescent health : official publication of the Society for Adolescent Medicine*. 2015;56(1  
525 Suppl):S7-14. doi: 10.1016/j.jadohealth.2014.09.011. PubMed PMID: 25528980.
- 526 17. Hong JS, Voisin DR, Hahm HC, Feranil M, Mountain SAS-K. A Review of Sexual  
527 Attitudes, Knowledge, and Behaviors Among South Korean Early Adolescents: Application of  
528 the Ecological Framework. *Journal of Social Service Research*. 2016;42(5):584-97. doi:  
529 10.1080/01488376.2016.1202879.
- 530 18. Pastuszak AW, Wenker EP, Smith PB, Abacan A, Lamb DJ, Lipshultz LI, et al.  
531 Comprehensive Assessment of Health Needs of Young Minority Males Attending a Family  
532 Planning Clinic. *American journal of men's health*. 2017;11(3):542-51. Epub 2016/02/06. Doi:  
533 10.1177/1557988316629627. PubMed PMID: 26846408; PubMed Central PMCID:  
534 PMCPMC5675233.
- 535 19. Bronfenbrenner U. *The Ecology of Human Development Experiments By Nature and*  
536 *Design*. Cambridge: Harvard University Press; 1979.
- 537 20. Ajayi AI, Otukpa EO, Mwoka M, Kabiru CW, Ushie BA. Adolescent sexual and  
538 reproductive health research in sub-Saharan Africa: a scoping review of substantive focus,  
539 research volume, geographic distribution and Africa-led inquiry. *BMJ Glob Health*. 2021;6(2).  
540 doi: 10.1136/. PubMed PMID: 33568395; PubMed Central PMCID: PMCPMC7878134.
- 541 21. Kågesten AE, Pinandari AW, Page A, Wilopo SA, van Reeuwijk M. Sexual wellbeing  
542 in early adolescence: a cross-sectional assessment among girls and boys in urban Indonesia.  
543 *Reproductive health*. 2021;18(1):153. Epub 2021/07/22. Doi: 10.1186/s12978-021-01199-4.  
544 PubMed PMID: 34284792; PubMed Central PMCID: PMCPMC8290574.
- 545 22. Muhwezi WW, Katahoire AR, Banura C, Mugooda H, Kwesiga D, Bastien S, et al.  
546 Perceptions and experiences of adolescents, parents and school administrators regarding

- 547 adolescent-parent communication on sexual and reproductive health issues in urban and rural  
548 Uganda. *Reproductive health*. 2015;12(1):110. doi: 10.1186/s12978-015-0099-3.
- 549 23. Kågesten AE, Kabiru CW, Maina B, German D, Blum RW. ‘Inexperienced’? Patterns  
550 in romantic and sexual experiences among urban poor early adolescents in Nairobi, Kenya.  
551 *Culture, health & sexuality*. 2018;20(12):1299-316. doi: 10.1080/13691058.2018.1432765.
- 552 24. National Institute of Statistics of Rwanda (NISR) [Rwanda], Ministry of Health (MOH)  
553 [Rwanda], ICF International. Rwanda Demographic and Health Survey 2014-15 Final Report.  
554 Rockville, Maryland, USA: NISR, MOH, and ICF International.; 2015.
- 555 25. Republic of Rwanda Ministry of Education. Competence-based Curriculum: Summary  
556 of Curriculum Framework Pre-Primary to Upper-Secondary. Kigali: Rwanda Education Board;  
557 2015.
- 558 26. Cleland J. Asking young people about sexual and reproductive behaviours Illustrative  
559 questionnaire for interview-surveys with young people: WHO; 2018 [cited 2018 25 March].  
560 Available from: <http://www.who.int/reproductivehealth/topics/adolescence/questionnaire/en/>.
- 561 27. Rose EM, Rajasingam D, Derkenne RC, Mitchell V, Ramlall AA. Reproductive health  
562 knowledge, attitudes and practices of adolescents attending an obstetric unit in Georgetown,  
563 Guyana. *Journal of Family Planning and Reproductive Health Care*. 2016;42(2):116. doi:  
564 10.1136/jfprhc-2014-100994. PubMed PMID: 26405297.
- 565 28. Bergström AS, Guevara WJU, Guevara WJU, Colombo PE, Källestal C, Källestal C, et  
566 al. Knowledge about Sexual and Reproductive Health among School Enrolled Adolescents in  
567 Tololar, Nicaragua, A Cross-Sectional Study. *Journal of Public Health International*.  
568 2018;1(2):27-38. doi: 10.14302/issn.2641-4538.jphi-18-2464.
- 569 29. Rose EM, Rajasingam D, Derkenne RC, Mitchell V, Ramlall AA. Reproductive health  
570 knowledge, attitudes and practices of adolescents attending an obstetric unit in Georgetown,



- 571 Guyana. The journal of family planning and reproductive health care. 2016;42(2):116-8. Epub  
572 2015/09/26. doi: 10.1136/jfprhc-2014-100994. PubMed PMID: 26405297.
- 573 30. Vongxay V, Albers F, Thongmixay S, Thongsombath M, Broerse JEW, Sychareun V,  
574 et al. Sexual and reproductive health literacy of school adolescents in Lao PDR. PloS one.  
575 2019;14(1):e0209675. doi: 10.1371/journal.pone.0209675. PubMed PMID: 30650100;  
576 PubMed Central PMCID: PMC6334956.
- 577 31. Lim MS, Zhang XD, Kennedy E, Li Y, Yang Y, Li L, et al. Sexual and reproductive  
578 health knowledge, contraception uptake, and factors associated with unmet need for modern  
579 contraception among adolescent female sex workers in China. PloS one. 2015;10(1):e0115435.  
580 doi: 10.1371/journal.pone.0115435. PubMed PMID: 25625194; PubMed Central PMCID:  
581 PMC6334956.
- 582 32. Lyu J, Shen X, Hesketh T. Sexual Knowledge, Attitudes and Behaviours among  
583 Undergraduate Students in China-Implications for Sex Education. Int J Environ Res Public  
584 Health. 2020;17(18). doi: 10.3390/ijerph17186716. PubMed PMID: 32942651; PubMed  
585 Central PMCID: PMC7559109.
- 586 33. Kemigisha E, Bruce K, Ivanova O, Leye E, Coene G, Ruzaaza GN, et al. Evaluation of  
587 a school based comprehensive sexuality education program among very young adolescents in  
588 rural Uganda. BMC public health. 2019;19(1):1393. doi: 10.1186/s12889-019-7805-y.
- 589 34. Olaleye AO, Obiyan MO, Folayan MO. Factors associated with sexual and reproductive  
590 health behaviour of street-involved young people: findings from a baseline survey in Southwest  
591 Nigeria. Reproductive health. 2020;17(1):94. doi: 10.1186/s12978-020-00937-4.
- 592 35. Markham CM, Craig Rushing S, Jessen C, Lane TL, Gorman G, Gaston A, et al. Factors  
593 Associated With Early Sexual Experience Among American Indian and Alaska Native Youth.  
594 Journal of Adolescent Health. 2015;57(3):334-41. doi  
595 <https://doi.org/10.1016/j.jadohealth.2015.06.003>.

- 596 36. Savioja H, Helminen M, Fröjd S, Marttunen M, Kaltiala-Heino R. Sexual experience  
597 and self-reported depression across the adolescent years. *Health Psychology and Behavioral*  
598 *Medicine*. 2015;3(1):337-47. doi: 10.1080/21642850.2015.1101696.
- 599 37. Kahn NF, Halpern CT. Experiences of Vaginal, Oral, and Anal Sex From Adolescence  
600 to Early Adulthood in Populations With Physical Disabilities. *The Journal of adolescent health*  
601 : official publication of the Society for Adolescent Medicine. 2018;62(3):294-302. doi  
602 10.1016/j.jadohealth.2017.08.003. PubMed PMID: 29056435.
- 603 38. Maina BW, Orindi BO, Sikweyiya Y, Kabiru CW. Gender norms about romantic  
604 relationships and sexual experiences among very young male adolescents in Korogocho slum  
605 in Kenya. *Int J Public Health*. 2020;65(4):497-506. doi: 10.1007/s00038-020-01364-9. PubMed  
606 PMID: 32270236; PubMed Central PMCID: PMC7275025.
- 607 39. Donatello RA, De Rosa CJ, Moulton BD, Chung EQ, Viola R, Rohrbach LA, et al.  
608 Patterns of Sexual Experience Among Urban Latino and African American Ninth Grade  
609 Students. *J Sex Res*. 2017;54(4-5):619-30. doi: 10.1080/00224499.2016.1164800. PubMed  
610 PMID: 27135138.
- 611 40. Ragsdale K, Bersamin MM, Schwartz SJ, Zamboanga BL, Kerrick MR, Grube JW.  
612 Development of sexual expectancies among adolescents: contributions by parents, peers and  
613 the media. *Journal of sex research*. 2014;51(5):551-60. Epub 04/30. Doi:  
614 10.1080/00224499.2012.753025. PubMed PMID: 23631710.
- 615 41. Bersamin MM, Fisher DA, Walker S, Hill DL, Grube JW. Defining virginity and  
616 abstinence: adolescents' interpretations of sexual behaviors. *The Journal of adolescent health* :  
617 official publication of the Society for Adolescent Medicine. 2007;41(2):182-8. doi  
618 10.1016/j.jadohealth.2007.03.011. PubMed PMID: 17659223; PubMed Central PMCID:  
619 PMCPMC1941649.

- 620 42. Mohammadi MR, Mohammad K, Farahani FKA, Alikhani S, Zare M, Tehrani FR, et  
621 al. Reproductive Knowledge, Attitudes and Behavior among Adolescents Males in Tehran,  
622 Iran. *International Family Planning Perspectives*. 2006;32(1):35-44.
- 623 43. De Meyer S, Jaruseviciene L, Zaborskis A, Decat P, Vega B, Cordova K, et al. A cross-  
624 sectional study on attitudes toward gender equality, sexual behavior, positive sexual  
625 experiences, and communication about sex among sexually active and non-sexually active  
626 adolescents in Bolivia and Ecuador. *Global health action*. 2014;7:24089. doi:  
627 10.3402/gha.v7.24089. PubMed PMID: 25024066; PubMed Central PMCID:  
628 PMC4095758.
- 629 44. Ezeanya-Esiobu C. The rise of homegrown ideas and grassroots voices: New directions  
630 in social policy in Rwanda. Geneva: United Nations Research Institute for Social Development  
631 (UNRISD), 2017.
- 632 45. Maina BW, Orindi BO, Osindo J, Ziraba AK. Depressive symptoms as predictors of  
633 sexual experiences among very young adolescent girls in slum communities in Nairobi, Kenya.  
634 *International Journal of Adolescence and Youth*. 2020;25(1):836-48. doi:  
635 10.1080/02673843.2020.1756861.
- 636 46. Baheiraei A, Khoori E, Foroushani AR, Ahmadi F, Ybarra ML. What sources do  
637 adolescents turn to for information about their health concerns? *International journal of*  
638 *adolescent medicine and health*. 2014;26(1):61-8. doi: 10.1515/ijamh-2012-0112. PubMed  
639 PMID: 23625280.
- 640 47. Nwagwu WE. The Internet as a source of reproductive health information among  
641 adolescent girls in an urban city in Nigeria. *BMC public health*. 2007;7. doi: 10.1186/1471-  
642 2458-7-354. PubMed PMID: PMC2241614.

- 643 48. Khurana A, Bleakley A. Young adults' sources of contraceptive information: variations  
644 based on demographic characteristics and sexual risk behaviors. *Contraception*.  
645 2015;91(2):157-63. doi: <https://doi.org/10.1016/j.contraception.2014.09.012>.
- 646 49. Macharia P, Pérez-Navarro A, Inwani I, Nduati R, Carrion C. An Exploratory Study of  
647 Current Sources of Adolescent Sexual and Reproductive Health Information in Kenya and Their  
648 Limitations: Are Mobile Phone Technologies the Answer? *International Journal of Sexual  
649 Health*. 2021;33(3):357-70. doi: 10.1080/19317611.2021.1918311.
- 650 50. Essop R, Tolla T, Lynch I, Mokoae M. 'They tell you about the risks' : exploring sources  
651 of sexuality education among very young adolescents in rural Mpumalanga. *South African  
652 Journal of Child Health*. 2018;2018(1):s36-s9. doi: doi:10.7196/SAJCH.2018.v12i2.1527.
- 653 51. Springate J, Omar HA. The Impact of the Internet on the Sexual Health of Adolescents:  
654 A Brief Review. *International Journal of Child and Adolescent Health*. 2013;6(4):469-71.
- 655 52. Usonwu I, Ahmad R, Curtis-Tyler K. Parent-adolescent communication on adolescent  
656 sexual and reproductive health in sub-Saharan Africa: a qualitative review and thematic  
657 synthesis. *Reproductive health*. 2021;18(1):202. doi: 10.1186/s12978-021-01246-0. PubMed  
658 PMID: 34629082; PubMed Central PMCID: PMC8504018.
- 659 53. Vongsavanh V, Lan VTH, Sychareun V. Sexual and reproductive health communication  
660 between parents and high school adolescents in Vientiane Prefecture, Lao PDR. *Global health  
661 action*. 2020;13(sup2):1785145. doi: 10.1080/16549716.2020.1785145.
- 662 54. Rogers AA. Parent-Adolescent Sexual Communication and Adolescents' Sexual  
663 Behaviors: A Conceptual Model and Systematic Review. *Adolescent Research Review*.  
664 2017;2(4):293-313. doi: 10.1007/s40894-016-0049-5.
- 665 55. Widman L, Choukas-Bradley S, Noar SM, Nesi J, Garrett K. Parent-Adolescent Sexual  
666 Communication and Adolescent Safer Sex Behavior: A Meta-Analysis. *JAMA Pediatr*.  
667 2016;170(1):52-61. doi: 10.1001/jamapediatrics.2015.2731. PubMed PMID: 26524189.

- 668 56. Baku EA, Agbemaflle I, Adanu RMK. Effects of parents training on parents' knowledge  
669 and attitudes about adolescent sexuality in Accra Metropolis, Ghana. *Reproductive health*.  
670 2017;14(1):101. doi: 10.1186/s12978-017-0363-9.
- 671 57. Maina BW, Ushie BA, Kabiru CW. Parent-child sexual and reproductive health  
672 communication among very young adolescents in Korogocho informal settlement in Nairobi,  
673 Kenya. *Reproductive health*. 2020;17(1):79. doi: 10.1186/s12978-020-00938-3. PubMed  
674 PMID: 32487239; PubMed Central PMCID: PMC7268390.
- 675 58. Kisaakye P, Ndugga P, Kwagala E, Kayitale Mbonye M, Ngabirano F, Ojiambo  
676 Wandera S. Parent-child communication on sexual and reproductive health in border districts  
677 of Eastern Uganda. *Sex Education*. 2022:1-13. doi: 10.1080/14681811.2022.2135500.
- 678 59. Isaksen KJ, Musonda P, Sandoy IF. Parent-child communication about sexual issues in  
679 Zambia: a cross sectional study of adolescent girls and their parents. *BMC public health*.  
680 2020;20(1):1120. doi: 10.1186/s12889-020-09218-y. PubMed PMID: 32677930; PubMed  
681 Central PMCID: PMC7364553.
- 682 60. Jing Z, Li J, Wang Y, Zhou C. Prevalence and Trends of Sexual Behaviors Among  
683 Young Adolescents Aged 12 Years to 15 Years in Low and Middle-Income Countries:  
684 Population-Based Study. *JMIR public health and surveillance*. 2023;9:e45236. Epub  
685 2023/06/07. Doi: 10.2196/45236. PubMed PMID: 37285196; PubMed Central PMCID:  
686 PMC710285621.
- 687 61. Roman Lay AA, Fujimori E, Simoes Duarte L, Vilela Borges AL. Prevalence and  
688 correlates of early sexual initiation among Brazilian adolescents. *PloS one*.  
689 2021;16(12):e0260815. doi: 10.1371/journal.pone.0260815. PubMed PMID: 34905552;  
690 PubMed Central PMCID: PMC8670678.

- 691 62. Jee Y, Lee G. Prevalence of sexual experience among Korean adolescent: age-period-  
692 cohort analysis. *Epidemiol Health*. 2020;42:e2020008. doi: 10.4178/epih.e2020008. PubMed  
693 PMID: 32124584; PubMed Central PMCID: PMC7285420.
- 694 63. Rizkianti A, Maisya IB, Kusumawardani N, Linhart C, Pardosi JF. Sexual Intercourse  
695 and Its Correlates Among School-aged Adolescents in Indonesia: Analysis of the 2015 Global  
696 School-based Health Survey. *J Prev Med Public Health*. 2020;53(5):323-31. doi:  
697 10.3961/jpmph.20.028. PubMed PMID: 33070504; PubMed Central PMCID:  
698 PMC7569018.
- 699 64. Lindberg LD, Maddow-Zimet I, Marcell AV. Prevalence of Sexual Initiation Before  
700 Age 13 Years Among Male Adolescents and Young Adults in the United States. *JAMA Pediatr*.  
701 2019;173(6):553-60. doi: 10.1001/jamapediatrics.2019.0458. PubMed PMID: 30958512;  
702 PubMed Central PMCID: PMC6547075.
- 703 65. Magnusson BM, Crandall A, Evans K. Early sexual debut and risky sex in young adults:  
704 the role of low self-control. *BMC public health*. 2019;19(1):1483. doi: 10.1186/s12889-019-  
705 7734-9. PubMed PMID: 31703650; PubMed Central PMCID: PMC6839049.
- 706 66. Hellerstedt WL, Peterson-Hickey M, Rhodes KL, Garwick A. Environmental, social,  
707 and personal correlates of having ever had sexual intercourse among American Indian youths.  
708 *American journal of public health*. 2006;96(12):2228-34. doi: 10.2105/AJPH.2004.053454.  
709 PubMed PMID: 17077401.
- 710 67. Darroch JE, Singh S, Woog V, Bankole A, Ashford LS. *Research Gaps in Adolescent*  
711 *Sexual and Reproductive Health*. Guttmacher Institute, 2016.
- 712 68. Adarsh H, Sahoo S. Pornography and Its Impact on Adolescent/Teenage Sexuality.  
713 *Journal of Psychosexual Health*. 2023;5(1):35-9. doi: 10.1177/26318318231153984.
- 714 69. Onyeonoro UU, Oshi DC, Ndimele EC, Chuku NC, Onyemuchara IL, Ezekwere SC, et  
715 al. Sources of Sex Information and its Effects on Sexual Practices among In-school Female

- 716 Adolescents in Osioma Ngwa LGA, South East Nigeria. *Journal of pediatric and adolescent*  
717 *gynecology*. 2011;24(5):294-9. doi: <https://doi.org/10.1016/j.jpag.2011.05.002>.
- 718 70. Pathmendra P, Raggatt M, Lim MSC, Marino JL, Skinner SR. Exposure to Pornography  
719 and Adolescent Sexual Behavior: Systematic Review. *J Med Internet Res*. 2023;25:e43116. doi:  
720 10.2196/43116.
- 721 71. Mekonnen BD. Early sexual debut and associated factors among students in Ethiopia:  
722 A systematic review and meta-analysis. *J Public Health Res*. 2020;9(3):1795. doi  
723 10.4081/jphr.2020.1795. PubMed PMID: 32874965; PubMed Central PMCID:  
724 PMC7445439.
- 725 72. Lim MSC, Agius PA, Carrotte ER, Vella AM, Hellard ME. Young Australians' use of  
726 pornography and associations with sexual risk behaviours. *Aust N Z J Public Health*.  
727 2017;41(4):438-43. doi: 10.1111/1753-6405.12678. PubMed PMID: 28664609.
- 728 73. Bukenya JN, Nakafeero M, Ssekamate T, Isabirye N, Guwatudde D, Fawzi WW.  
729 Sexual behaviours among adolescents in a rural setting in eastern Uganda: a cross-sectional  
730 study. *Tropical Medicine & International Health*. 2020;25(1):81-8. doi:  
731 <https://doi.org/10.1111/tmi.13329>.
- 732 74. Maas MK, Bray BC, Noll JG. Online Sexual Experiences Predict Subsequent Sexual  
733 Health and Victimization Outcomes Among Female Adolescents: A Latent Class Analysis. *J*  
734 *Youth Adolesc*. 2019;48(5):837-49. doi: 10.1007/s10964-019-00995-3. PubMed PMID:  
735 30778831; PubMed Central PMCID: PMC7135936.
- 736 75. Reis LF, Surkan PJ, Atkins K, Garcia-Cerde R, Sanchez ZM. Risk Factors for Early  
737 Sexual Intercourse in Adolescence: A Systematic Review of Cohort Studies. *Child Psychiatry*  
738 *Hum Dev*. 2023:1-14. doi: 10.1007/s10578-023-01519-8. PubMed PMID: 36966237; PubMed  
739 Central PMCID: PMC710039773.

- 740 76. Kushal SA, Amin YM, Reza S, Hossain FB, Shawon MSR. Regional and Sex  
741 Differences in the Prevalence and Correlates of Early Sexual Initiation Among Adolescents  
742 Aged 12-15 Years in 50 Countries. *The Journal of adolescent health : official publication of the*  
743 *Society for Adolescent Medicine*. 2022;70(4):607-16. doi: 10.1016/j.jadohealth.2021.10.027.  
744 PubMed PMID: 34895994.
- 745 77. Shayo FK, Kalomo MH. Prevalence and correlates of sexual intercourse among sexually  
746 active in-school adolescents: an analysis of five sub-Sahara African countries for the  
747 adolescent's sexual health policy implications. *BMC public health*. 2019;19(1):1285. doi:  
748 10.1186/s12889-019-7632-1. PubMed PMID: 31606038; PubMed Central PMCID:  
749 PMCPMC6790023.
- 750 78. Alemu MT, Dessie Y, Gobena T, Mazeingia YT, Abdu AO. Oral and anal sexual  
751 practice and associated factors among preparatory school youths in Dire Dawa city  
752 administration, Eastern Ethiopia. *PloS one*. 2018;13(11):e0206546. doi:  
753 10.1371/journal.pone.0206546. PubMed PMID: 30403714; PubMed Central PMCID:  
754 PMCPMC6221345.
- 755 79. Furlanetto MF, Ghedin DM, Goncalves TR, Marin AH. Individual and contextual  
756 factors associated with sexual initiation among adolescents. *Psicol Reflex Crit*. 2019;32(1):25.  
757 doi: 10.1186/s41155-019-0138-z. PubMed PMID: 32026196; PubMed Central PMCID:  
758 PMCPMC6967213.
- 759 80. Finlay JE, Assefa N, Mwanyika-Sando M, Dessie Y, Harling G, Njau T, et al. Sexual  
760 and reproductive health knowledge among adolescents in eight sites across sub-Saharan Africa.  
761 *Tropical Medicine & International Health*. 2020;25(1):44-53. doi:  
762 <https://doi.org/10.1111/tmi.13332>.



763 81. Wellings K, Collumbien M, Slaymaker E, Singh S, Hodges Z, Patel D, et al. Sexual  
764 behaviour in context: a global perspective. *The Lancet*. 2006;368(9548):1706-28. doi:  
765 [https://doi.org/10.1016/S0140-6736\(06\)69479-8](https://doi.org/10.1016/S0140-6736(06)69479-8).

766
